- Sex differences in the perception of noxious experimental stimuli: A meta-analysis. *Pain* 1998; 74:181-7
33. Carvalho B, Angst MS, Fuller AJ, Lin E, Mathusamy AD, Riley ET: Experimental heat pain for detecting pregnancy-induced analgesia in humans. *Anesth Analg* 2006; 103:1283-7
  34. Gintzler AR: Endorphin-mediated increases in pain threshold during pregnancy. *Science* 1980; 210:193-5
  35. Sander HW, Gintzler AR: Spinal cord mediation of the opioid analgesia of pregnancy. *Brain Res* 1987; 408:389-93
  36. Jarvis S, McLean KA, Chirnside J, Deans LA, Calvert SK, Molony V, Lawrence AB: Opioid-mediated changes in nociceptive threshold during pregnancy and parturition in the sow. *Pain* 1997; 72:153-9
  37. Vedolin GM, Lobato VV, Conti PC, Lauris JR: The impact of stress and anxiety on the pressure pain threshold of myofascial pain patients. *J Oral Rehabil* 2009; 36:313-21
  38. Roeska K, Ceci A, Treede RD, Doods H: Effect of high trait anxiety on mechanical hypersensitivity in male rats. *Neurosci Lett* 2009; 464:160-4
  39. Lehofer M, Liebmann PM, Moser M, Schauenstein K: Nervousness and pain sensitivity: I. A positive correlation. *Psychiatry Res* 1998; 79:51-3

## ANESTHESIOLOGY REFLECTIONS

### Annie Oakley Guns Down “Cocaine Libel”

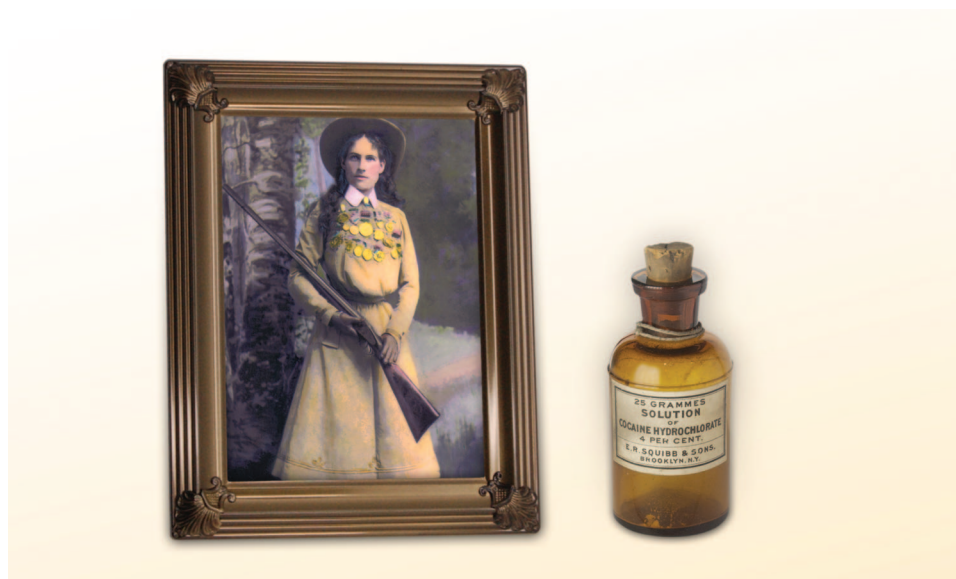

From 6 to 15 yr of age, sharpshooter Phoebe “Annie” Mosey (1860–1926) sniped at rural Ohio’s wild game with such accurate “headshots” that her proceeds paid off her widowed mother’s mortgage. Avoiding Annie’s stage surname of Oakley (a family name from a Cincinnati suburb), “Buffalo Bill” Cody billed her from 1885 to 1901 on his “Wild West Show” as Sitting Bull’s adopted daughter, “Little Sure Shot.” Later, after newspapers sensationalized a Chicago actress’ confusing claim of abusing cocaine as “Any Oakley,” the real Annie gunned down 54 of her 55 legal opponents in libel suits. Ironically, a 66-yr-old Annie Oakley would die . . . not from a gunshot . . . but from the lack of a shot—lack of a simple vitamin B-12 injection to reverse the fatal course of her pernicious anemia. (Copyright © the American Society of Anesthesiologists, Inc. This image also appears in the *Anesthesiology Reflections* online collection available at [www.anesthesiology.org](http://www.anesthesiology.org).)

*George S. Bause, M.D., M.P.H., Honorary Curator, ASA’s Wood Library-Museum of Anesthesiology, Park Ridge, Illinois, and Clinical Associate Professor, Case Western Reserve University, Cleveland, Ohio. UJYC@aol.com.*
